# Supplementary material for: Leveraging blood serotonin as an endophenotype to identify de novo and rare variants involved in autism
Source: Springer Nature journal article supplement (doi:10.1186/s13229-017-0130-3), 2017-03-21

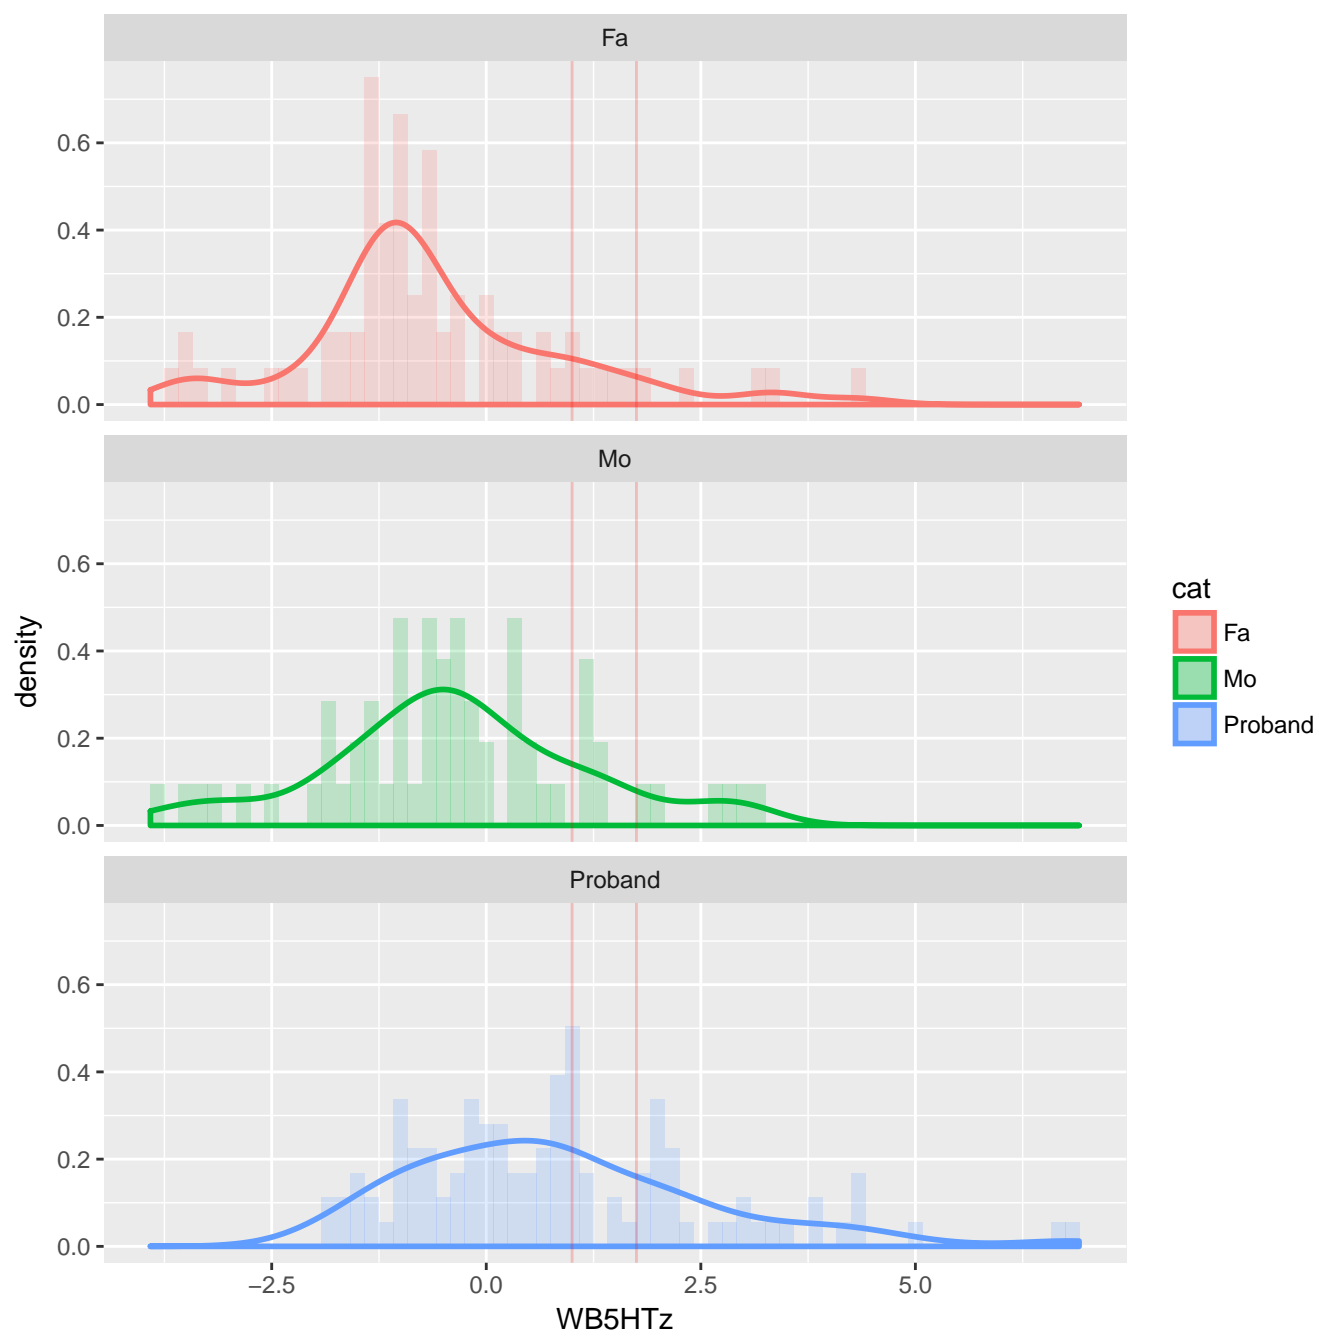

Supplement: MOESM2 [file 12165134]
